# Supplementary material for: Chromatin states responsible for the regulation of differentially expressed genes under 60Co~γ ray radiation in rice
Source: PubMed Central journal article supplement (PMC5639768; doi:10.1186/s12864-017-4172-x), 2017-10-12
Supplement: 12864_2017_4172_MOESM2_ESM.pdf [file 12864_2017_4172_MOESM2_ESM.pdf]

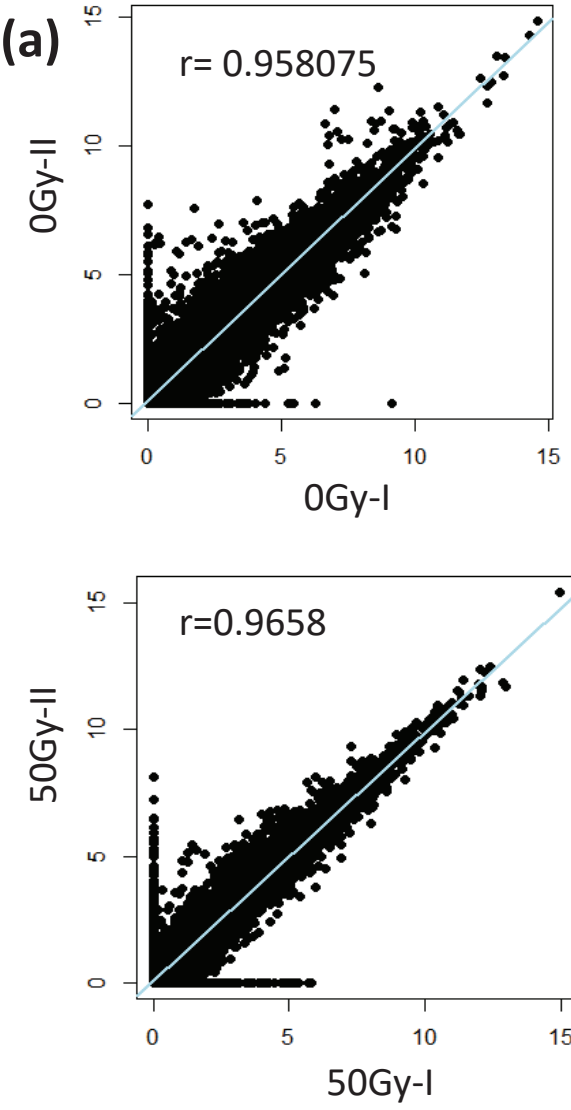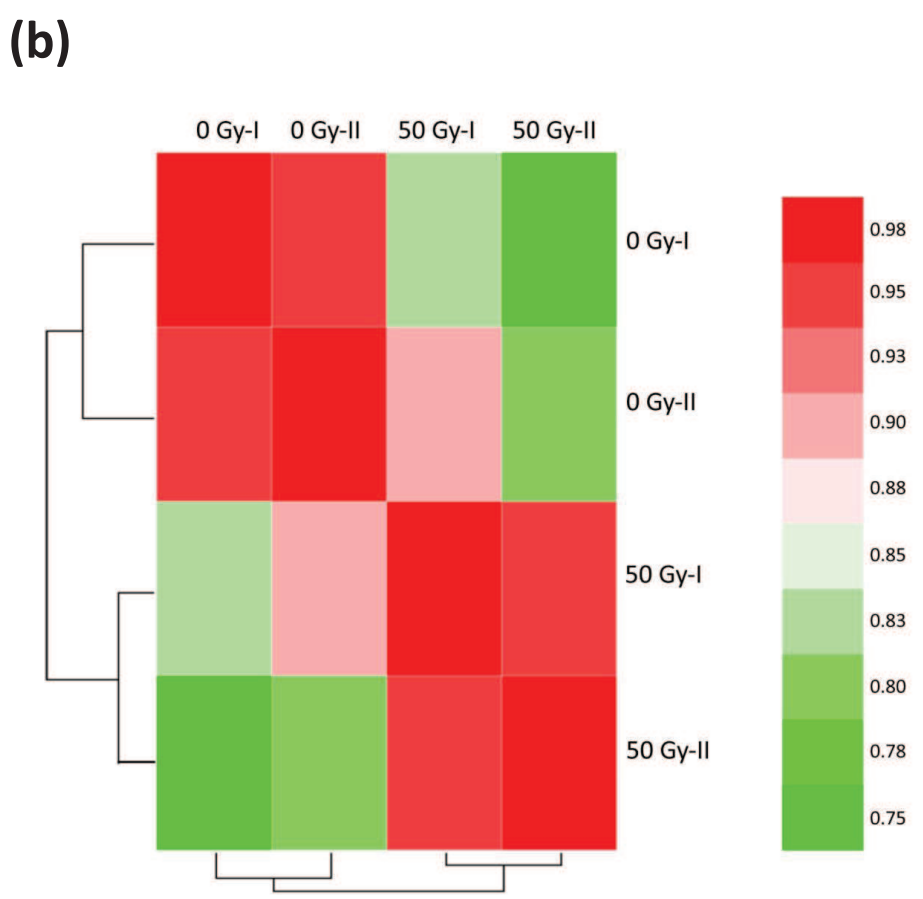

Fig. S2
