# Supplementary material for: Chromatin states responsible for the regulation of differentially expressed genes under 60Co~γ ray radiation in rice
Source: PubMed Central journal article supplement (PMC5639768; doi:10.1186/s12864-017-4172-x), 2017-10-12
Supplement: 12864_2017_4172_MOESM4_ESM.pdf [file 12864_2017_4172_MOESM4_ESM.pdf]

**Table S2: Summary of genes information for qRT-PCR**

| Locus number     | Forward primer          | Reverse primer         | qRT-PCR | RNA-seq |
|------------------|-------------------------|------------------------|---------|---------|
| LOC_Os04g33050   | ATAGCATGCCACAACAAGGAGA  | TAAGAGCTTTGGATGGTGGCAT | +       | +       |
| LOC_Os01g65890   | TCTTGGTCACGAAGAGATCCTA  | GTGATGATTCTGGGGCTATGA  | +       | +       |
| LOC_Os02g57350   | ATGGGGAAGAAGAGCAAGAACG  | GATCTTGTCCTTGACCCATTG  | +       | +       |
| LOC_Os05g15770   | TGTCGCACAAGGATCTCTACTA  | GTCTTCTGTCCAGTACCTG    | +       | +       |
| LOC_Os10g11500   | ACTACCACTACGACCAACAC    | TCGTAGTTGCAGGTGATGAACA | +       | +       |
| LOC_Os05g34150   | GAGGACCTCGGCAACAAGAG    | GTACTGGAGGATGATGACGGAC | +       | +       |
| LOC_Os10g18370   | GAGGAGTGCTTCTTCTGCTG    | GAAGAAGCGGAAGTCCCTCAC  | +       | +       |
| LOC_Os08g33100   | GACAACAAGAAGACGCGGATC   | GAGGAGCAGGTTGTGGATGTT  | +       | +       |
| LOC_Os08g06110.2 | GCTCTTCATGTGTTCCAACAC   | CCATGAATCACTTGTGCTTGCA | +       | +       |
| LOC_Os12g31370   | TGGTGGACGCTTGGATTGAT    | CAGGATCCAGGGCGCTAT     | +       | +       |
| LOC_Os07g30670.1 | TGCATCGTCGAGGTAGTTGAAG  | CACGCCAATCTCCATGTCTTTG | -       | -       |
| LOC_Os01g50622.1 | TGCGGATTACAGAAATGGTCCA  | TAGGAACCTTACACCGGAAAGC | -       | -       |
| LOC_Os03g38950.1 | CTTCCCAGACGAAAACGTTGTC  | GAATCGGAATCCATTGGGCATG | -       | -       |
| LOC_Os01g01340.1 | ACAGCTCTAACATCTCGGTGTT  | TCGTCGTAGGATAGGTAGTCCC | -       | -       |
| LOC_Os08g33100   | GACAACAAGAAGACGCGGATC   | GAGGAGCAGGTTGTGGATGTT  | -       | -       |
| LOC_Os07g43810   | GTGGCTTTGGATTTCGTACA    | ATCTTGGCGGAAATCATCC    | -       | -       |
| LOC_Os10g39150   | GTTTCATCAACGCCCTCAAACAA | GAAGCCTGTCAATTGCCGATAC | **      | -       |
| LOC_Os11g40150   | GTTTGGAGTGGCTGTGGTTA    | TGAGCCATGATGTTTCCACC   | -       | -       |

+: up-regulated genes  
 -: down-regulated genes  
 \*\* null
