# Supplementary material for: Chromatin states responsible for the regulation of differentially expressed genes under 60Co~γ ray radiation in rice
Source: PubMed Central journal article supplement (PMC5639768; doi:10.1186/s12864-017-4172-x), 2017-10-12
Supplement: 12864_2017_4172_MOESM7_ESM.pdf [file 12864_2017_4172_MOESM7_ESM.pdf]

**Table S4: The  $p$ -value of Wilcoxon rank-sum test (one side) for each mark distributed across up-regulated genes between 0 Gy and 50 Gy**

| FPKM  | H3K4ac   | H3K27ac | H4K12ac   | H3K4me1   | H3K4me3  | H3K27me3  | H3K36me3 |
|-------|----------|---------|-----------|-----------|----------|-----------|----------|
| >50   | 0.33760  | 0.00713 | < 2.2e-16 | 1.63E-13  | 8.67E-05 | 0.00023   | 0.03123  |
| 10~50 | 0.002004 | 0.00024 | < 2.2e-16 | < 2.2e-16 | 2.95E-06 | < 2.2e-16 | 2.66E-05 |
| 1~10  | 1.84E-11 | 0.14530 | < 2.2e-16 | < 2.2e-16 | 0.42770  | 5.48E-13  | 0.01675  |
| <1    | 0.005122 | 0.13250 | 0.00087   | 1.87E-14  | 0.00076  | 0.01933   | 0.20770  |
