# Supplementary material for: Chromatin states responsible for the regulation of differentially expressed genes under 60Co~γ ray radiation in rice
Source: PubMed Central journal article supplement (PMC5639768; doi:10.1186/s12864-017-4172-x), 2017-10-12
Supplement: 12864_2017_4172_MOESM9_ESM.pdf [file 12864_2017_4172_MOESM9_ESM.pdf]

**Table S5: The *p*-value of Wilcoxon rank-sum test (one side) for each mark distributed across down-regulated genes between 0 Gy and 50 Gy**

| FPKM  | H3K4ac   | H3K27ac  | H4K12ac   | H3K4me1  | H3K4me3  | H3K27me3  | H3K36me3 |
|-------|----------|----------|-----------|----------|----------|-----------|----------|
| >50   | 1.52E-07 | 2.44E-09 | < 2.2e-16 | 8.10E-06 | 4.93E-09 | < 2.2e-16 | 0.00046  |
| 10~50 | 3.51E-08 | 3.37E-09 | < 2.2e-16 | 1.57E-12 | 0.06666  | < 2.2e-16 | 0.14240  |
| 1~10  | 9.59E-05 | 2.08E-06 | < 2.2e-16 | 1.52E-09 | 7.74E-08 | 7.67E-12  | 0.43400  |
