# Supplementary material for: Chromatin states responsible for the regulation of differentially expressed genes under 60Co~γ ray radiation in rice
Source: PubMed Central journal article supplement (PMC5639768; doi:10.1186/s12864-017-4172-x), 2017-10-12
Supplement: 12864_2017_4172_MOESM11_ESM.pdf [file 12864_2017_4172_MOESM11_ESM.pdf]

**Table S6: Summary of the sequencing mapping of RNA-seq and ChIP-seq data sets**

| ID                | Treat (Gy)    | Time (min) | Total reads (Million) | Mapping ratio (%) | Unique Reads (%) | PE (bp) |
|-------------------|---------------|------------|-----------------------|-------------------|------------------|---------|
| RNA-seq           | 0(CK)-Rep I   | 0          | 19,619,836            | 88.2              | 81.66            | 150     |
| RNA-seq           | 0(CK) -Rep II | 0          | 28,641,205            | 90.9              | 84.97            | 150     |
| RNA-seq           | 50-Rep I      | 30         | 15,793,445            | 89.0              | 82.54            | 150     |
| RNA-seq           | 50-Rep II     | 30         | 15,509,128            | 88.8              | 82.14            | 150     |
| H3K27ac-ChIP-seq  | 0 (CK)        | 0          | 14,626,517            | 89.48             | 75.49            | 50      |
| H3K4ac-ChIP-seq   | 0(CK)         | 0          | 14,808,579            | 82.07             | 67.08            | 50      |
| H4K12ac-ChIP-seq  | 0(CK)         | 0          | 9,056,851             | 89.87             | 75.16            | 50      |
| H3K4me1-ChIP-seq  | 0(CK)         | 0          | 14,054,023            | 95.50             | 84.17            | 50      |
| H3K4me3-ChIP-seq  | 0(CK)         | 0          | 14,981,689            | 95.79             | 85.52            | 50      |
| H3K27me3-ChIP-seq | 0(CK)         | 0          | 24,493,313            | 86.29             | 71.82            | 50      |
| H3K36me3-ChIP-seq | 0(CK)         | 0          | 18,915,487            | 89.64             | 78.84            | 50      |
| H3K27ac-ChIP-seq  | 50            | 30         | 14,834,801            | 96.75             | 84.08            | 50      |
| H3K4ac-ChIP-seq   | 50            | 30         | 10,089,525            | 93.54%            | 78.61%           | 50      |
| H4K12ac-ChIP-seq  | 50            | 30         | 11,230,555            | 91.85%            | 73.28%           | 50      |
| H3K4me1-ChIP-seq  | 50            | 30         | 15,727,547            | 97.19%            | 89.06%           | 50      |
| H3K4me3-ChIP-seq  | 50            | 30         | 12,874,673            | 96.10%            | 87.66%           | 50      |
| H3K27me3-ChIP-seq | 50            | 30         | 13,500,535            | 92.77%            | 81.07%           | 50      |
| H3K36me3-ChIP-seq | 50            | 30         | 17,360,244            | 94.76%            | 85.40%           | 50      |

Note: PE represents paired-end sequencing
