# Supplementary material for: Chromatin states responsible for the regulation of differentially expressed genes under 60Co~γ ray radiation in rice
Source: PubMed Central journal article supplement (PMC5639768; doi:10.1186/s12864-017-4172-x), 2017-10-12
Supplement: 12864_2017_4172_MOESM12_ESM.pdf [file 12864_2017_4172_MOESM12_ESM.pdf]

**Table S7: Summary of anti-H4K12ac based ChIP-qPCR assay**

| Locus number   | FPKM<br>(0Gy/50Gy) | Forward primer         | Reverse primer         | ChIP-qPCR<br>(0Gy/50Gy) | t-test | ChIP-seq |
|----------------|--------------------|------------------------|------------------------|-------------------------|--------|----------|
| LOC_Os01g65890 | 7.1/351.9          | TTCCCCGGGTAAAACCTGCC   | CCACCTCCATCTCCACGAAC   | —                       | **     | —        |
| LOC_Os05g45350 | 9.7/125.2          | GACCTTAGGAGCTGTGCCTATG | GAACACTCACGACGCCAAGAA  | —                       | **     | —        |
| LOC_Os06g46950 | 18.8/197.8         | AGGAGGGGTTCGAGGACTAC   | CTGTGGAAGGTGATGAGCCC   | —                       | **     | —        |
| LOC_Os10g35770 | 63.8/178.7         | AGTTCTCCGGCTCTGCT      | GGCTGAGGAAGACGGTCT     | —                       | *      | —        |
| LOC_Os03g19720 | 38/123             | GAGGACATCGCCGCCATG     | GTCGTCGAACCCACCTT      | —                       | **     | —        |
| LOC_Os01g70850 | 8.2/198.1          | GAATTCGAAGCAGCTGAGC    | GACCACCCTGTACCAGCAC    | —                       | **     | —        |
| LOC_Os09g27040 | 1.3/43.8           | GTTGTTGATCTTGGCCTGCC   | CCCCGTCCATCAAGAAGTCG   | +                       | N      | —        |
| LOC_Os06g11240 | 9.1/34.4           | GTGTAGTACAGCACCGCGT    | GCTGACGCCGTACAAGATG    | —                       | **     | —        |
| LOC_Os01g64120 | 46.0/120.8         | AGCTGCCTTACTCGTGCC     | CACGTACCCCTGCTCGAT     | —                       | *      | —        |
| LOC_Os01g21160 | 24.6/68.3          | GCTCCTCTTCTCCTAGTGCT   | GCCTACCAATCCATCCAGACC  | —                       | **     | —        |
| LOC_Os03g05780 | 27.6/57.0          | AGATGGTGATGACGAGCTTGG  | CTCTACCCGGTCTGCTTCTTC  | —                       | **     | —        |
| LOC_Os03g56310 | 19.3/45.4          | ATGGGACGGCTAAAACAAAACG | TTGCGGTTCTCTGGTGATTCTT | —                       | *      | —        |
| LOC_Os01g50622 | 147.8/1.1          | CTGTTTGTGTCAGTTACGGCTC | AATTACCAGCCTCCATCACGC  | —                       | **     | —        |
| LOC_Os03g01750 | 122.1/42.9         | CTGTTCGTCACTGCTGGATTTC | AATGGAATGGAAGAGGGGTCAC | —                       | *      | —        |
| LOC_Os06g50080 | 101.41/23.9        | CAGGAGCAGATGGACATGGAC  | GGAGTACACAACACTAGCTGGT | —                       | *      | —        |
| LOC_Os09g32250 | 31/15              | GCTCAGGGCGAAGATCTCC    | CCATCGAACCCCAATGAAGC   | —                       | *      | —        |
| LOC_Os10g38910 | 93.7/3.1           | GAGAGGTTGGTTGTGGAGGT   | AAACCAGCGAAACCACCATC   | —                       | **     | —        |
| LOC_Os08g32930 | 94.9/5.2           | CTCAGATTTAGCCGCGTCG    | GTAACGATGCTCCCTCCCG    | —                       | **     | —        |
| LOC_Os06g26234 | 29/11.3            | CGGTTTCCCTCTGCTAAATT   | CAGGCAAATCTGTCAGCAATAT | —                       | **     | —        |
| LOC_Os03g48040 | 143.1/64.6         | CGTCGTCACAGGTTAATCA    | GCACGAATCAGACAAAGCACA  | —                       | **     | —        |
| LOC_Os07g30670 | 249.4/14.5         | AGCACAAACAGCAGAGGAGG   | AGCGAGGAATCACTGAATCGG  | —                       | **     | —        |
| LOC_Os08g02400 | 196.5/94.6         | CTTCTTCGCGGCCTTCATGAT  | TTCCATTCCCTTTTCACGGTGA | —                       | **     | —        |

-: decrease in H4K12ac post IR; +: more enriched H4K12ac post-IR  
 \*\*:  $p < 0.01$  in t-test; \*:  $p < 0.05$  in t-test; N: not significant in t-test
